# Supplementary material for: An easy-to-use primer design tool to address paralogous loci and T-DNA insertion sites in the genome of Arabidopsis thaliana
Source: PubMed Central journal article supplement (PMC4169229; doi:10.1186/1746-4811-10-28), 2014-09-13
Supplement: 1746-4811-10-28-S1.pdf [file 1746-4811-10-28-S1.pdf]

**Table S1. Statistics for insertion site predictions in the GABI-Kat collection**

The table is divided into three parts. First, data for whole FSTs are presented. Second, data from the "1-to-N" FST analyses which allowed to consider more than one BLAST hit per FST are shown. Third, data for paralog groups are summarised. Hits from category 2 were not considered.

|                                                                             | total numbers | only one hit | two or more hits |
|-----------------------------------------------------------------------------|---------------|--------------|------------------|
| No. of FSTs with at least one BLAST hit to TAIRv10 genome sequence:         | 135,210       |              |                  |
| No. of predicted insertion loci <sup>1),2)</sup> :                          | 91,383        |              |                  |
| FSTs separated according to No. of hits:                                    |               | 105,399      | 29,811           |
| No. of deduced insertion site predictions:                                  |               | 105,399      | 80,210           |
| No. of predicted insertion loci <sup>1)</sup> :                             |               | 72,202       | 68,679           |
| <hr/>                                                                       |               |              |                  |
| No. of FST regions with insertion site prediction:                          | 153,919       |              |                  |
| No. of predicted insertion loci from FST regions <sup>1),2)</sup> :         | 102,494       |              |                  |
| FST regions separated according to No. of hits:                             |               | 137,985      | 15,934           |
| No. of deduced insertion site predictions:                                  |               | 137,985      | 45,028           |
| No. of predicted insertion loci from FST regions <sup>1)</sup> :            |               | 94,260       | 38,038           |
| <hr/>                                                                       |               |              |                  |
| No. of paralog groups:                                                      | 10,737        |              |                  |
| No. of predicted insertion loci in paralog groups <sup>1)</sup> :           | 28,836        |              |                  |
| No. of FST regions with insertion site prediction in paralog groups:        | 17,318        |              |                  |
| Paralog groups containing loci with very similar likelihood <sup>3)</sup> : | 4,605         |              |                  |

<sup>1)</sup> <1000 bp difference for the insertion site prediction in individual lines required

<sup>2)</sup> only best prediction in a given line is counted

<sup>3)</sup> difference in BLAST e-value for predictions of <1e-5 required

Comment to Table S1: GABI-Kat lines usually contain more than one T-DNA insertion, and for most lines several FSTs have been produced. Although the different FSTs from a given line might lead to the prediction of different insertion loci, it is also possible that the different FSTs are derived from a single insertion site. This is the reason for the lower number of "predicted insertion loci" compared to the insertion site predictions according to whole FSTs or regions of FSTs. For the differentiation between the same and independent insertion loci, we empirically determined a distance requirement of 1000 bp for insertion site predictions from a given line. If similar insertion positions are found in different lines, they are counted separately even if the difference of the predictions is less than 1000 bp.

For the definition of different regions of FSTs with hits in the genome we allowed a maximum of 10 bp overlap of the BLAST hits of the regions. The increase of the number of total insertion site or loci predictions when analysing FST regions compared to whole FSTs was explained by the contribution from composite FSTs derived from lines with more than one T-DNA insertion (153,919/102,494 vs. 135,210/91,383).

The table differentiates if one or more predictions have been derived from FSTs or FST regions. It displays in this way the gain in the number of insertion site predictions from the 1-to-N analyses. Concerning the statistics for FSTs or FST regions with more than one paralogous prediction from a single region we allowed a maximum of  $1e-10$  in the BLAST hit difference. If the difference is even more significant, further paralogous predictions are ignored. The increase from paralogous predictions is most obvious for FST regions with more than one BLAST hit (15,934 FST regions resulting in 45,028 insertion site predictions).

The numbers concerning paralog groups indicates how often the precision of insertion site predictions might be affected by closely related paralogs. The number of 4,605 paralog groups containing locus predictions with a BLAST e-value difference of less than  $1e-5$  also demonstrates the necessity of an automatic primer design, which takes paralogous regions into account. The "No. of FST regions with insertion site prediction in paralog groups" (17,318) is higher than the total number of FST regions with more than

one hit (15,934) because additional FST regions with only a single hit were included if they support one of the insertion site predictions included in a paralog group within a given line.
